# Supplementary material
Source: PubMed Central journal article supplement (PMC4151774)
Supplement: 1408888111_pnas.201408888SI.pdf [file 1408888111_pnas.201408888SI.pdf]

# Supporting Information

Hughes et al. 10.1073/pnas.1408888111

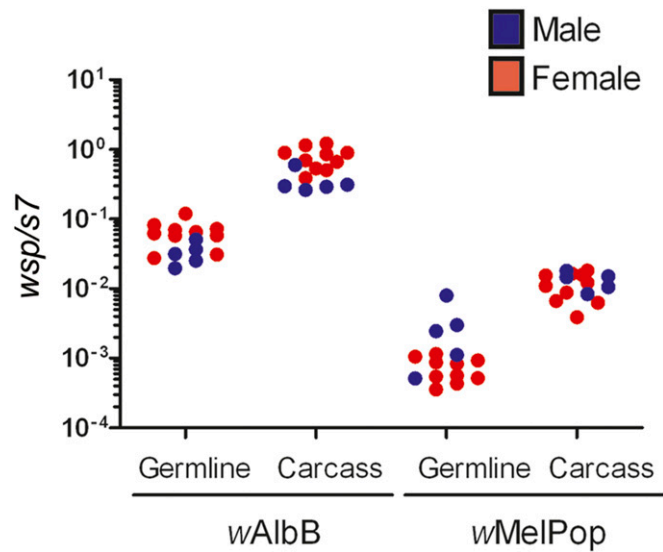

**Fig. S1.** Comparison of *Wolbachia* titers after intrathoracic microinjection into *Anopheles gambiae* males and females. wAlbB infected both ovaries and testes better than wMelPop ( $P < 0.05$ ), and higher titers were observed in the carcass vs. the gonads for both strains ( $P < 0.05$ ). No significant difference was observed between males and females in either the gonads or carcass within treatments. Data were analyzed by Kruskal–Wallis test using the Dwass procedure for multiple comparisons.

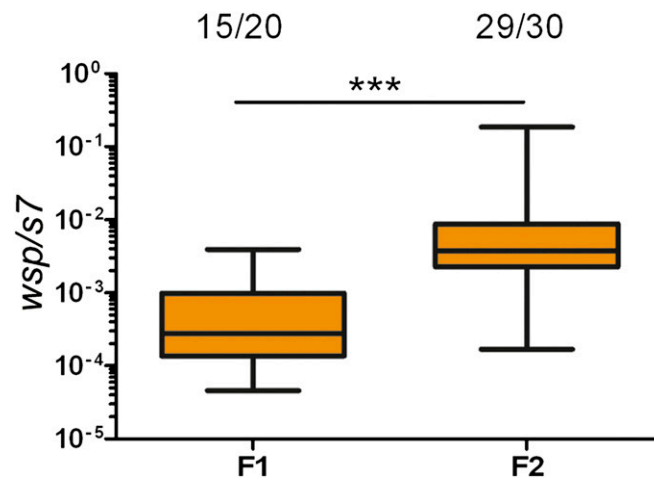

**Fig. S2.** Injection of wAlbB over multiple generations in antibiotic-treated *A. stephensi* significantly boosts both *Wolbachia* infection frequency (Fisher's exact test,  $P = 0.03$ ) and titer (Mann–Whitney  $U$  test,  $***P < 0.0001$ ). Fractions represent the number of infected offspring over the total number. Box and whiskers represent data quartiles and range, respectively.





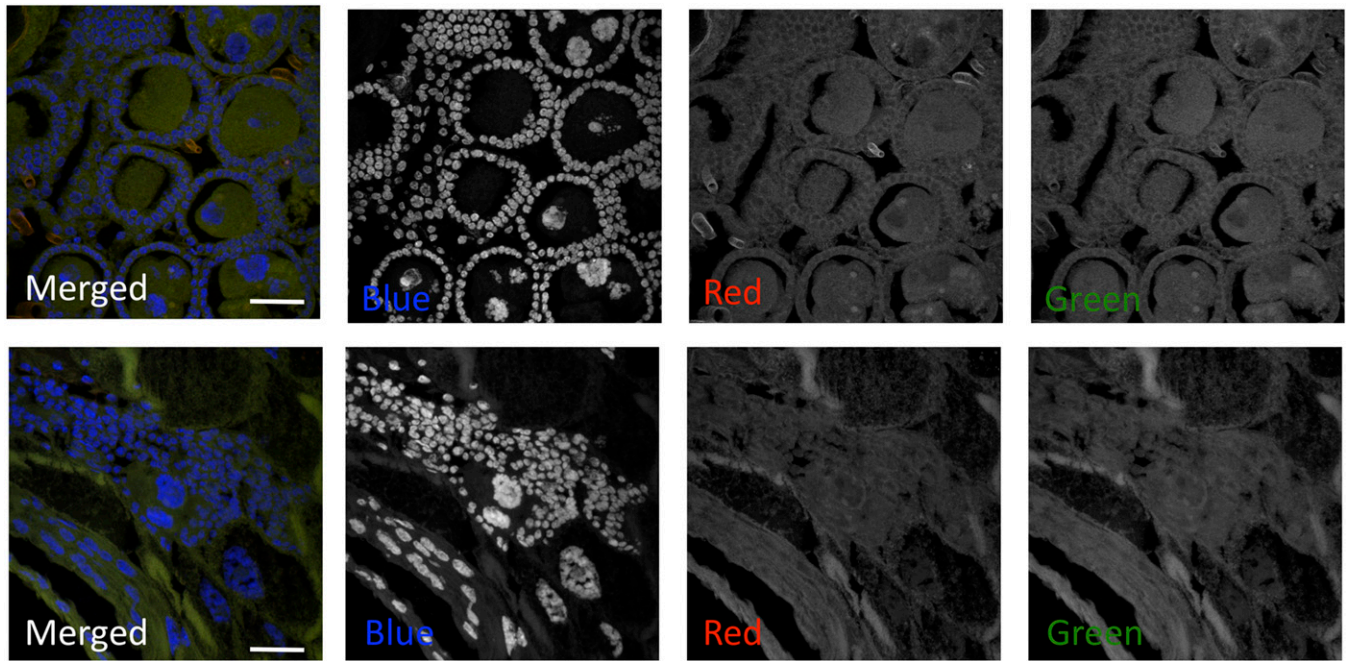

**Fig. S8.** No-probe (*Upper*) and uninfected mosquito (*Lower*) controls for FISH showing the merged image and individual channel (blue, red, and green). Blue denotes mosquito DNA. In the no-probe control, trachea surrounding the ovary display autofluorescence in the red channel. (Scale bars: 60  $\mu\text{m}$ .)

**Table S1.** Mean OTU frequency (read count) for conventionally reared vs. antibiotic-treated *A. gambiae* and *A. stephensi* mosquitoes

[Table S1](#)

For each species, 16S sequencing reads were clustered at the 97% similarity level against the 13\_8 release of the Greengenes 16S database (1) into OTUs (*Materials and Methods*). OTUs that significantly ( $P < 0.05$ ) changed in frequency between treatments are highlighted in bold. Significance was calculated by a nonparametric *t* test with Monte Carlo simulation (implemented in Quantitative Insights into Microbial Ecology) (2).

1. DeSantis TZ, et al. (2006) Greengenes, a chimera-checked 16S rRNA gene database and workbench compatible with ARB. *Appl Environ Microbiol* 72(7):5069–5072.
2. Caporaso JG, et al. (2010) QIIME allows analysis of high-throughput community sequencing data. *Nat Methods* 7(5):335–336.
